# Supplementary material for: Synthesis, Properties of Biodegradable Poly(Butylene Succinate-co-Butylene 2-Methylsuccinate) and Application for Sustainable Release
Source: PubMed Central journal article supplement (PMC6539853; doi:10.3390/ma12091507), 2019-05-09
Supplement: materials-12-01507-s001.pdf [file materials-12-01507-s001.pdf]

Supplementary Materials

# Synthesis, Properties of Biodegradable Poly(Butylene Succinate-co-Butylene 2-Methylsuccinate) and Application for Sustainable Release

Jiarui Han, Jiaxin Shi, Zhining Xie, Jun Xu \* and Baohua Guo \*

Key Laboratory of Advanced Materials of Ministry of Education of China, Department of Chemical Engineering, Tsinghua University, Beijing 100084, China; chaxiangmeimei@163.com (J.H.); shijx13@tsinghua.org.cn (J.S.); xiezhining@126.com (Z.X.)

\* Correspondence: jun-xu@mail.tsinghua.edu.cn (J.X.); bhguo@mail.tsinghua.edu.cn (B.G.)

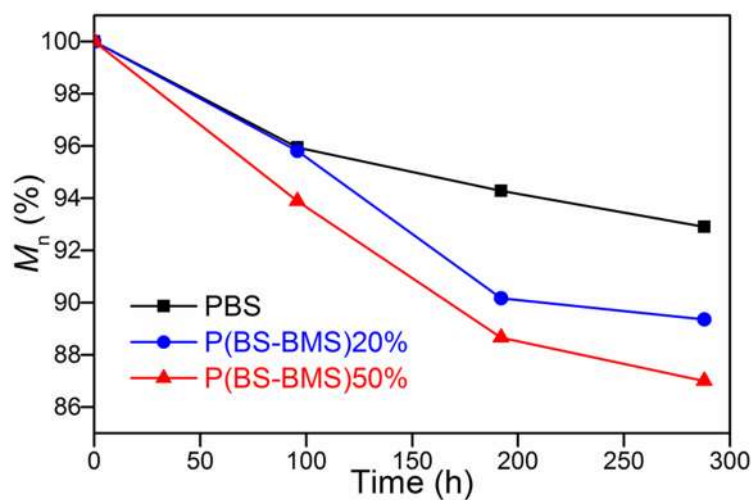

**Figure S1.**  $M_n$  losses of pure PBS and P(BS-BMS) copolymer residual films in enzymatic degradation environment in different time intervals.

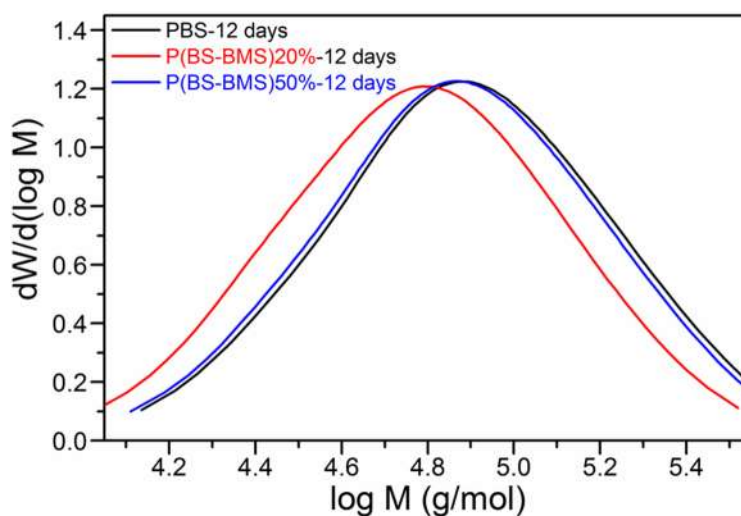

**Figure S2.** GPC curves of P(BS-BMS) copolymers and pure PBS after 12 days degradation process.

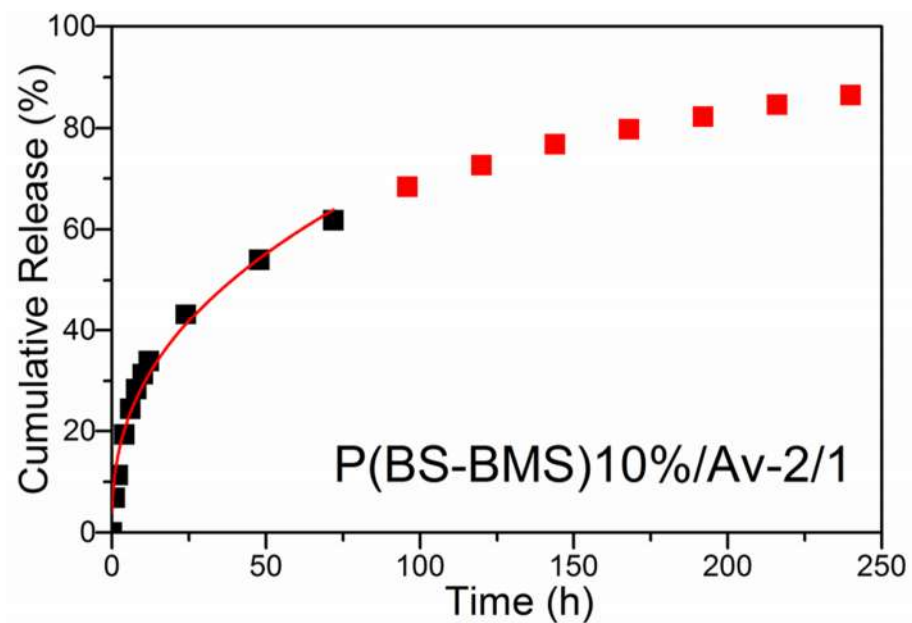

**Figure S3.** Fitting curve of P(BS-BMS)10%/Av-2/1 release profile according to *Korsmeier-Peppas* equation.

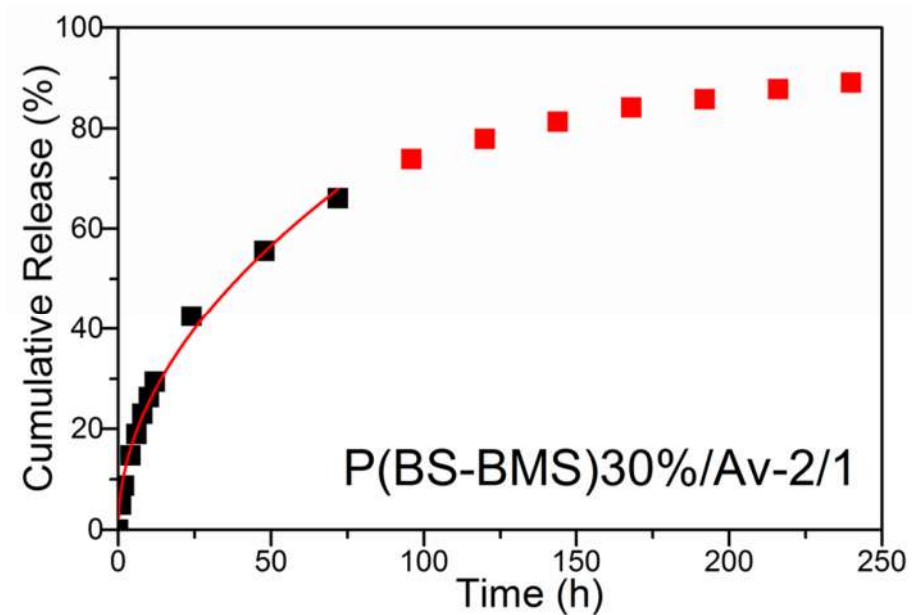

**Figure S4.** Fitting curve of P(BS-BMS)30%/Av-2/1 release profile according to *Korsmeier-Peppas* equation.

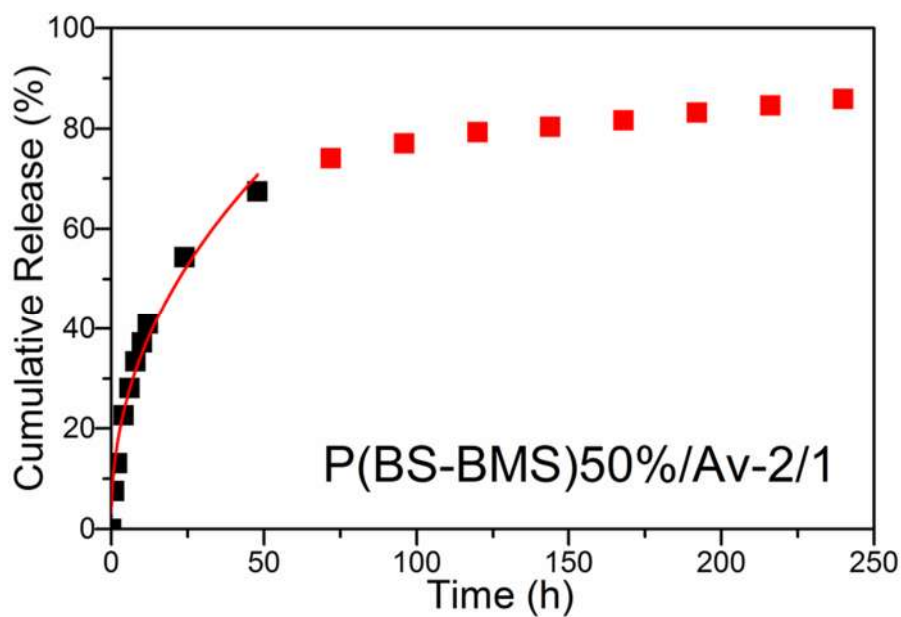

**Figure S5.** Fitting curve of P(BS-BMS)50%/Av-2/1 release profile according to *Korsmeyer-Peppas* equation.

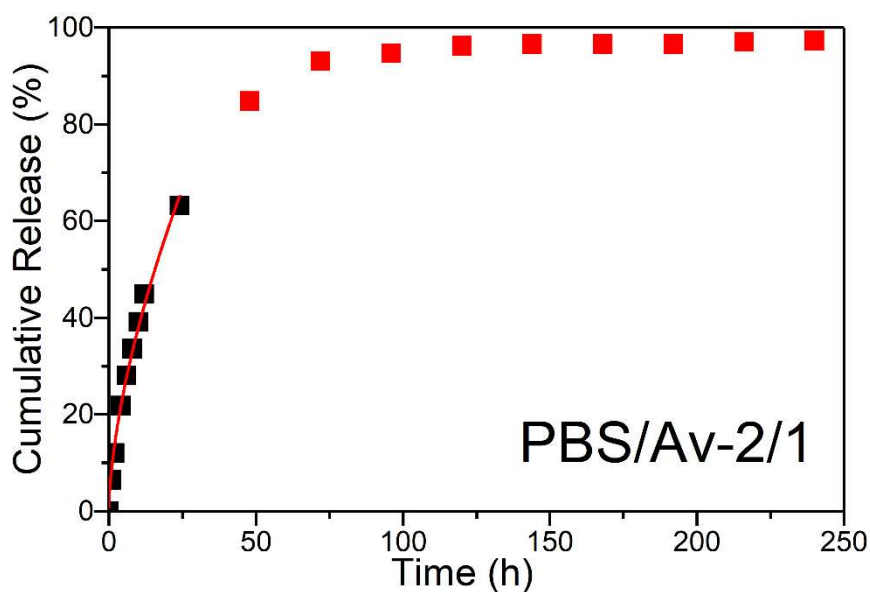

**Figure S6.** Fitting curve of PBS/Av-2/1 release profile according to *Korsmeyer-Peppas* equation.

**Table S1.** Weight loss data of pure PBS and P(BS-BMS) copolymers during enzyme degradation test.

| Copolymer    | Initial (%) | 48h (%) | 96h (%) | 156h (%) | 216h (%) | 288h (%) |
|--------------|-------------|---------|---------|----------|----------|----------|
| PBS          | 100         | 99.1    | 99.2    | 99.1     | 99.2     | 99.5     |
| P(BS-BMS)10% | 100         | 99.3    | 99.2    | 99.1     | 99.2     | 99.5     |
| P(BS-BMS)20% | 100         | 97.8    | 95.5    | 91.2     | 88.0     | 84.8     |
| P(BS-BMS)30% | 100         | 92.8    | 85.7    | 75.7     | 64.7     | 54.1     |
| P(BS-BMS)50% | 100         | 86.7    | 74.2    | 60.1     | 45.3     | 31.6     |

**Table S2.** Molecular weight data of pure PBS and P(BS-BMS) copolymers by GPC test.

| Copolymer    | 4 days                       |      | 8 days                       |      | 12 days                      |      |
|--------------|------------------------------|------|------------------------------|------|------------------------------|------|
|              | $M_n \times 10^{-4}$ (g/mol) | PDI  | $M_n \times 10^{-4}$ (g/mol) | PDI  | $M_n \times 10^{-4}$ (g/mol) | PDI  |
| PBS          | 6.04                         | 1.71 | 5.94                         | 1.72 | 5.85                         | 1.74 |
| P(BS-BMS)20% | 4.92                         | 1.69 | 4.63                         | 1.76 | 4.59                         | 1.76 |
| P(BS-BMS)50% | 6.04                         | 1.71 | 5.70                         | 1.81 | 5.60                         | 1.75 |

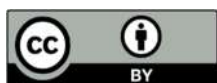

© 2019 by the authors. Licensee MDPI, Basel, Switzerland. This article is an open access article distributed under the terms and conditions of the Creative Commons Attribution (CC BY) license (<http://creativecommons.org/licenses/by/4.0/>).
